# Supplementary material for: Elotuzumab plus pomalidomide and dexamethasone in relapsed/refractory multiple myeloma: a multicenter, retrospective, real-world experience with 200 cases outside of controlled clinical trials
Source: PubMed Central journal article supplement — Haematologica. 2023 Jul 13;109(1):245–55. doi: 10.3324/haematol.2023.283251 (PMC10772491; doi:10.3324/haematol.2023.283251), 2023-07-13

# Elotuzumab plus pomalidomide and dexamethasone in relapsed/refractory multiple myeloma: a multicenter, retrospective, real-world experience with 200 cases outside of controlled clinical trials

Massimo Gentile,<sup>1,2</sup> Ernesto Vigna,<sup>1</sup> Salvatore Palmieri,<sup>3</sup> Monica Galli,<sup>4</sup> Daniele Derudas,<sup>5</sup> Roberto Mina,<sup>6</sup> Roberta Della Pepa,<sup>7</sup> Renato Zambello,<sup>8</sup> Enrica Antonia Martino,<sup>1</sup> Antonella Bruzzese,<sup>1</sup> Silvia Mangiacavalli,<sup>9</sup> Elena Zamagni,<sup>10,11</sup> Catello Califano,<sup>12</sup> Maurizio Musso,<sup>13</sup> Concetta Conticello,<sup>14</sup> Claudio Cerchione,<sup>15</sup> Giuseppe Mele,<sup>16</sup> Nicola Di Renzo,<sup>17</sup> Massimo Offidani,<sup>18</sup> Giuseppe Tarantini,<sup>19</sup> Gloria Margiotta Casaluci,<sup>20</sup> Angela Rago,<sup>21</sup> Roberto Ria,<sup>22</sup> Giuseppina Uccello,<sup>23</sup> Gregorio Barilà,<sup>24</sup> Gaetano Palumbo,<sup>25</sup> Alessandra Pompa,<sup>26</sup> Donatella Vincelli,<sup>27</sup> Marino Brunori,<sup>28</sup> Fabrizio Accardi,<sup>29</sup> Valeria Amico,<sup>30</sup> Angela Amendola,<sup>31</sup> Raffaele Fontana,<sup>32</sup> Velia Bongarzone,<sup>33</sup> Bernardo Rossini,<sup>34</sup> Emilia Cotzia,<sup>35</sup> Alessandro Gozzetti,<sup>36</sup> Rita Rizzi,<sup>37</sup> Nicola Sgherza,<sup>37</sup> Eleonora Ferretti,<sup>38</sup> Giuseppe Bertuglia,<sup>6</sup> Davide Nappi,<sup>15</sup> Maria Teresa Petrucci,<sup>39</sup> Francesco Di Raimondo,<sup>14</sup> Antonino Neri,<sup>38</sup> Fortunato Morabito<sup>40</sup> and Pellegrino Musto<sup>37</sup>

<sup>1</sup>Department of Onco-Hematology, Hematology Unit, Azienda Ospedaliera Annunziata, Cosenza;

<sup>2</sup>Department of Pharmacy, Health and Nutritional Science, University of Calabria, Rende; <sup>3</sup>Hematology Unit, Ospedale Cardarelli, Naples; <sup>4</sup>Hematology and Bone Marrow Transplant Unit, Azienda Socio-Sanitaria Territoriale-Papa Giovanni XXIII, Bergamo; <sup>5</sup>Department of Hematology, Businco Hospital, Cagliari; <sup>6</sup>Division of Hematology, AOU Città della Salute e della Scienza di Torino, University of Turin, Turin; <sup>7</sup>Hematology Unit, Department of Clinical Medicine and Surgery, University of Naples “Federico II”, Naples; <sup>8</sup>University of Padova, Department of Medicine, Hematology Unit and Veneto Institute of Molecular Medicine, Padova; <sup>9</sup>Hematology Division, Department of Hematology-Oncology, IRCCS Fondazione Policlinico San Matteo, Pavia; <sup>10</sup>IRCCS Azienda Ospedaliero-Universitaria di Bologna, Istituto di Ematologia “Seràgnoli”, Bologna; <sup>11</sup>Dipartimento di Medicina Specialistica, Diagnostica e Sperimentale, Università di Bologna, Bologna; <sup>12</sup>Onco-Hematology Unit, “A. Tortora” Hospital, Pagani; <sup>13</sup>Onco-Hematology Unit and TMO UOC, Department of Oncology, Palermo; <sup>14</sup>Division of Hematology, Azienda Policlinico-S. Marco, University of Catania, Catania; <sup>15</sup>Hematology Unit, IRCCS Istituto Romagnolo per lo Studio dei Tumori (IRST) “Dino Amadori”, Meldola; <sup>16</sup>Department of Hematology, Hospital Perrino, Brindisi; <sup>17</sup>Department of Hematology, “Vito Fazzi” Hospital, Lecce; <sup>18</sup>Hematology Unit, AOU Ospedali Riuniti di Ancona, Ancona; <sup>19</sup>Hematology Unit, “Dimiccoli” Hospital, Barletta; <sup>20</sup>Division of Hematology, Department of Translational Medicine, University of Eastern Piedmont, Novara; <sup>21</sup>Haematology Unit, ASL Roma 1 Santo Spirito Hospital of Rome, Rome; <sup>22</sup>Department of Biomedical Science, Internal Medicine “G. Baccelli”, Policlinico, University of Bari “Aldo Moro” Medical School, Bari; <sup>23</sup>Hematology Department, “G. Garibaldi” Hospital, Catania; <sup>24</sup>University of Padova, Department of Medicine, Hematology Unit, Veneto Institute of Molecular Medicine, Padova; <sup>25</sup>Department of Hematology, Hospital University Riuniti, Foggia; <sup>26</sup>Hematology Unit, Fondazione IRCCS Ca’ Granda, Ospedale Maggiore Policlinico, Milan; <sup>27</sup>Department of Hemato-Oncology and Radiotherapy, Hematology Unit, Great Metropolitan Hospital “Bianchi-Melacrino-Morelli”, Reggio Calabria; <sup>28</sup>Internal Medicine, Ospedale S. Croce, Azienda Ospedaliera Ospedali Riuniti Marche Nord, Fano; <sup>29</sup>Department of Hematology I, Azienda Ospedaliera Ospedali Riuniti Villa Sofia-Cervello, Palermo; <sup>30</sup>Hematology Unit, AORN “G Rummo”, Benevento; <sup>31</sup>Hematology Unit, Azienda Ospedaliera Regionale “San Carlo”, Potenza; <sup>32</sup>Hematology and Transplant Center, University Hospital “San Giovanni di Dio e Ruggi d’Aragona”, Salerno; <sup>33</sup>Department of Hematology San Giovanni-Addolorata Hospital, Rome; <sup>34</sup>Hematology, Ospedale Giovanni Paolo II°, Bari; <sup>35</sup>Section of Hematology, Ospedale “E. Muscatello-Augusta”, Siracusa; <sup>36</sup>Hematology, Azienda Ospedaliera Universitaria Senese, University of Siena, Siena; <sup>37</sup>Hematology Section, Department of Precision and Regenerative Medicine and Ionian Area (DiMePRE-J), “Aldo Moro” University of Bari, Bari; <sup>38</sup>Scientific Directorate, Azienda USL-IRCCS di Reggio Emilia, Reggio Emilia; <sup>39</sup>Department of Translational and Precision Medicine, Hematology Azienda Policlinico Umberto I Sapienza University of Rome, Rome and <sup>40</sup>Biotechnology Research Unit, AO of Cosenza, Cosenza, Italy

**Correspondence:** M. Gentile  
[massim.gentile@tiscali.it](mailto:massim.gentile@tiscali.it)

A. Neri  
[antonino.neri@ausl.re.it](mailto:antonino.neri@ausl.re.it)

**Received:** April 7, 2023.

**Accepted:** July 6, 2023.

**Early view:** July 13, 2023.

<https://doi.org/10.3324/haematol.2023.283251>

©2024 Ferrata Storti Foundation

Published under a CC BY-NC license

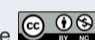

## SUPPLEMENTARY APPENDIX CONTENTS

**Elotuzumab plus pomalidomide and dexamethasone in relapsed/refractory multiple myeloma: a multicenter, retrospective real-world experience with 200 cases outside of controlled clinical trials**

**Massimo Gentile<sup>1,2</sup>, Ernesto Vigna<sup>1</sup>, Salvatore Palmieri<sup>3</sup>, Monica Galli<sup>4</sup>, Daniele Derudas<sup>5</sup>, Roberto Mina<sup>6</sup>, Roberta Della Pepa<sup>7</sup>, Renato Zambello<sup>8</sup>, Enrica Antonia Martino<sup>1</sup>, Antonella Bruzzese<sup>1</sup>, Silvia Mangiacavalli<sup>9</sup>, Elena Zamagni<sup>10,11</sup>, Catello Califano<sup>12</sup>, Maurizio Musso<sup>13</sup>, Concetta Conticello<sup>14</sup>, Claudio Cerchione<sup>15</sup>, Giuseppe Mele<sup>16</sup>, Nicola Di Renzo<sup>17</sup>, Massimo Offidani<sup>18</sup>, Giuseppe Tarantini<sup>19</sup>, Gloria Margiotta Casaluci<sup>20</sup>, Angela Rago<sup>21</sup>, Roberto Ria<sup>22</sup>, Giuseppina Uccello<sup>23</sup>, Gregorio Barilà<sup>24</sup>, Gaetano Palumbo<sup>25</sup>, Alessandra Pompa<sup>26</sup>, Donatella Vincelli<sup>27</sup>, Marino Brunori<sup>28</sup>, Fabrizio Accardi<sup>29</sup>, Valeria Amico<sup>30</sup>, Angela Amendola<sup>31</sup>, Raffaele Fontana<sup>32</sup>, Velia Bongarzoni<sup>33</sup>, Bernardo Rossini<sup>34</sup>, Emilia Cotzia<sup>35</sup>, Alessandro Gozzetti<sup>36</sup>, Rita Rizzi<sup>37</sup>, Nicola Sgherza<sup>37</sup>, Eleonora Ferretti<sup>38</sup>, Giuseppe Bertuglia<sup>6</sup>, Davide Nappi<sup>15</sup>, Maria Teresa Petrucci<sup>39</sup>, Francesco Di Raimondo<sup>14</sup>, Antonino Neri<sup>38</sup>, Fortunato Morabito<sup>40</sup>, Pellegrino Musto<sup>37</sup>.**

<sup>1</sup>Department of Onco-hematology, Hematology Unit, Azienda Ospedaliera Annunziata, Cosenza, Italy; <sup>2</sup>Department of Pharmacy, Health and Nutritional Science, University of Calabria, Rende, Italy; <sup>3</sup>Hematology Unit, Ospedale Cardarelli, Napoli, Italy; <sup>4</sup>Hematology and Bone Marrow Transplant Unit, Azienda Socio-Sanitaria Territoriale-Papa Giovanni XXIII, Bergamo, Italy; <sup>5</sup>Department of Hematology, Businco Hospital, Cagliari, Italy; <sup>6</sup>Division of Hematology, AOU Città della Salute e della Scienza di Torino, University of Torino, Torino, Italy; <sup>7</sup>Hematology Unit, Department of Clinical Medicine and Surgery, University of Naples "Federico II", Naples, Italy; <sup>8</sup>University of Padova, Department of Medicine, Hematology Unit, Italy; Veneto Institute of Molecular Medicine, Padova, Italy; <sup>9</sup>Hematology Division, Department of Hematology-Oncology, IRCCS Fondazione Policlinico San Matteo, Pavia, Italy; <sup>10</sup>IRCCS Azienda Ospedaliero-Universitaria di Bologna, Istituto di Ematologia "Seràgnoli", Bologna, Italy; <sup>11</sup>Dipartimento di Medicina Specialistica, Diagnostica e Sperimentale, Università di Bologna, Bologna, Italy; <sup>12</sup>Onco-Hematology Unit, "A. Tortora" Hospital, Pagani, Italy; <sup>13</sup>Onco-Hematology Unit and TMO U.O.C., Department of Oncology, Palermo, Italy; <sup>14</sup>Division of Hematology, Azienda Policlinico-S. Marco, University of Catania, Catania, Italy; <sup>15</sup>Hematology Unit, IRCCS Istituto Romagnolo per lo Studio dei Tumori (IRST) "Dino Amadori"; <sup>16</sup>Department of Hematology, Hospital Perrino, Brindisi, Italy; <sup>17</sup>Department of Hematology, Hospital Vito Fazzi, Lecce, Italy; <sup>18</sup>Hematology Unit, AOU Ospedali Riuniti di Ancona, Ancona, Italy; <sup>19</sup>Hematology Unit, "Dimiccoli" Hospital, Barletta (BAT), Italy; <sup>20</sup>Division of Hematology, Department of Translational Medicine, University of Eastern Piedmont, Novara, Italy; <sup>21</sup>Haematology Unit, ASL ROMA 1 Santo Spirito Hospital of Rome Rome Italy; <sup>22</sup>Department of Biomedical Science, Internal Medicine "G. Baccelli", Policlinico, University of Bari "Aldo Moro" Medical School, Bari, Italy; <sup>23</sup>Hematology Department, G. Garibaldi Hospital, Catania, Italy; <sup>24</sup>University of Padova, Department of Medicine,

Hematology Unit, Italy; Veneto Institute of Molecular Medicine, Padova, Italy; <sup>25</sup>Department of Hematology, Hospital University Riuniti, Foggia, Italy; <sup>26</sup>Hematology Unit, Fondazione IRCCS Ca' Granda, Ospedale Maggiore Policlinico, Milano, Italy; <sup>27</sup>Department of Hemato-Oncology and Radiotherapy, Hematology Unit, Great Metropolitan Hospital "Bianchi-Melacrino-Morelli", Reggio Calabria, Italy; <sup>28</sup>Internal Medicine, Ospedale S. Croce, Azienda Ospedaliera Ospedali Riuniti Marche Nord, Fano, Italy; <sup>29</sup>Department of Hematology I, Azienda Ospedaliera Ospedali Riuniti Villa Sofia-Cervello, Palermo, Italy; <sup>30</sup>Hematology Unit, AORN G Rummo, Benevento, Italy; <sup>31</sup>Hematology Unit, Azienda Ospedaliera Regionale "San Carlo", Potenza, Italy; <sup>32</sup>Hematology and Transplant Center, University Hospital "San Giovanni di Dio e Ruggi d'Aragona", Salerno, Italy; <sup>33</sup>Department of Hematology San Giovanni-Addolorata Hospital Rome Italy; <sup>34</sup>Haematology, Ospedale Giovanni Paolo II°, Bari, Italy; <sup>35</sup>Section of Hematology- Ospedale E. Muscatello-Augusta, Siracusa, Italy; <sup>36</sup>Hematology, Azienda Ospedaliera Universitaria Senese, University of Siena, Siena, Italy; <sup>37</sup>Hematology Section, Department of Precision and Regenerative Medicine and Ionian Area (DiMePre-J), University of Bari 'Aldo Moro', Bari, Italy; <sup>38</sup>Scientific Directorate, Azienda USL-IRCCS of Reggio Emilia, Reggio Emilia, Italy; <sup>39</sup>Department of Translational and Precision Medicine, Hematology Azienda Policlinico Umberto I Sapienza University of Rome, Rome, Italy; <sup>40</sup>Biotechnology Research Unit, AO of Cosenza, Cosenza, Italy.

**Correspondence: Massimo Gentile, MD, Hematology Unit, AO of Cosenza, Italy; 87100 Cosenza, Italy; e-mail: [massim.gentile@tiscali.it](mailto:massim.gentile@tiscali.it); ph: +39-0984-681329; fax: +39-0984-681329; Antonino Neri, MD, Scientific Directorate, Azienda USL-IRCCS of Reggio Emilia, Reggio Emilia, Italy; e-mail: [antonino.neri@ausl.re.it](mailto:antonino.neri@ausl.re.it); ph: +39-0522-296434; fax: +39-0522-296434.**

**Supplementary Table**

**Supplementary Figure Legends**

**Supplementary Figures**

**Supplementary Table 1. Main characteristics of patients at EloPd initiation according to FISH analysis availability.**

|                                      | <b>No. of cases without FISH analysis available (%)</b> | <b>No. of cases with FISH analysis available (%)</b> | <b>P value</b> |
|--------------------------------------|---------------------------------------------------------|------------------------------------------------------|----------------|
| <b>Age, (years)</b>                  |                                                         |                                                      |                |
| <70                                  | 54 (40)                                                 | 32 (45)                                              | 0.48           |
| ≥70                                  | 66 (60)                                                 | 48 (55)                                              |                |
| <b>Sex</b>                           |                                                         |                                                      |                |
| Male                                 | 62 (51.7)                                               | 46 (57.5)                                            | 0.59           |
| Female                               | 58 (48.3)                                               | 34 (42.5)                                            |                |
| <b>Paraproteins (isotype)</b>        |                                                         |                                                      |                |
| Immunoglobulin G                     | 71 (59.2)                                               | 50 (62.5)                                            | 0.63           |
| Immunoglobulin A                     | 28 (23.3)                                               | 16 (20)                                              |                |
| Immunoglobulin D                     | 1 (0.8)                                                 | 2 (2.5)                                              |                |
| Immunoglobulin M                     | 2 (1.7)                                                 | 0                                                    |                |
| Light chain only                     | 18 (15)                                                 | 12 (15)                                              |                |
| <b>Creatinine clearance (mL/min)</b> |                                                         |                                                      |                |
| ≥60                                  | 72 (60)                                                 | 60 (75)                                              | <b>0.03</b>    |
| <60                                  | 48 (40)                                                 | 20 (25)                                              |                |
| <b>Stage ISS, (%) (n=255)</b>        |                                                         |                                                      |                |
| I                                    | 35 (39.2)                                               | 26 (32.5)                                            | 0.86           |
| II                                   | 52 (43.3)                                               | 34 (42.5)                                            |                |
| III                                  | 33 (27.5)                                               | 20 (25)                                              |                |
| <b>LDH</b>                           |                                                         |                                                      |                |
| Normal                               | 85 (70.8)                                               | 57 (71.3)                                            | 0.95           |
| Elevated                             | 35 (29.2)                                               | 23 (28.7)                                            |                |
| <b>Previous lines of therapy</b>     |                                                         |                                                      |                |
| 2                                    | 46 (57.5)                                               | 55 (45.8)                                            | 0.11           |
| >2                                   | 34 (42.5)                                               | 65 (54.2)                                            |                |
| <b>Previous ASCT</b>                 |                                                         |                                                      |                |
| No                                   | 60 (50)                                                 | 41 (51.2)                                            | 0.86           |
| Yes                                  | 60 (50)                                                 | 39 (48.8)                                            |                |
| <b>Previous daratumumab</b>          |                                                         |                                                      |                |
| No                                   | 30 (25)                                                 | 24 (30)                                              | 0.43           |
| Yes                                  | 90 (75)                                                 | 56 (70)                                              |                |
| <b>Disease status</b>                |                                                         |                                                      |                |
| Biochemical relapse                  | 14 (11.7)                                               | 16 (20)                                              | 0.1            |
| Symptomatic relapse                  | 63 (52.5)                                               | 31 (38.8)                                            |                |
| Refractory to last treatment         | 43 (35.8)                                               | 33 (41.2)                                            |                |

## Supplementary Figures legend

**Supplementary Figure 1.** Kaplan Meier curves for RRMM patients treated with EloPd according to daratumumab exposure. **Panel A.** Kaplan Meier curve of PFS. **Panel B.** Kaplan Meier curve of OS.

**Supplementary Figure 2.** Kaplan Meier curves for RRMM patients treated with EloPd according to FISH risk. **Panel A.** Kaplan Meier curve of PFS. **Panel B.** Kaplan Meier curve of OS.

Supplementary Figure 1A

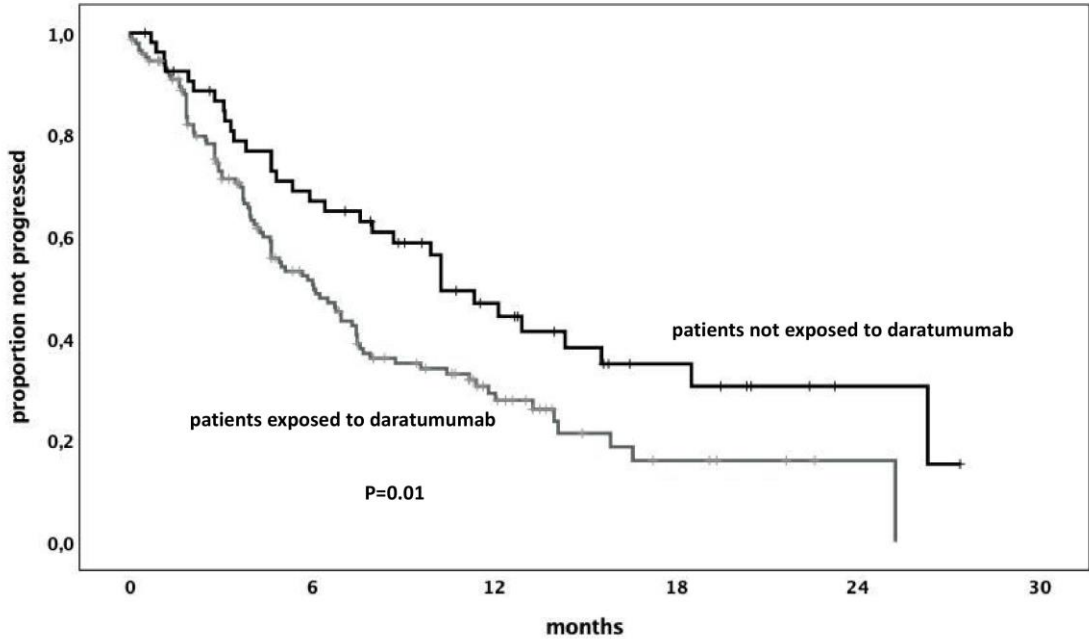

Supplementary Figure 1B

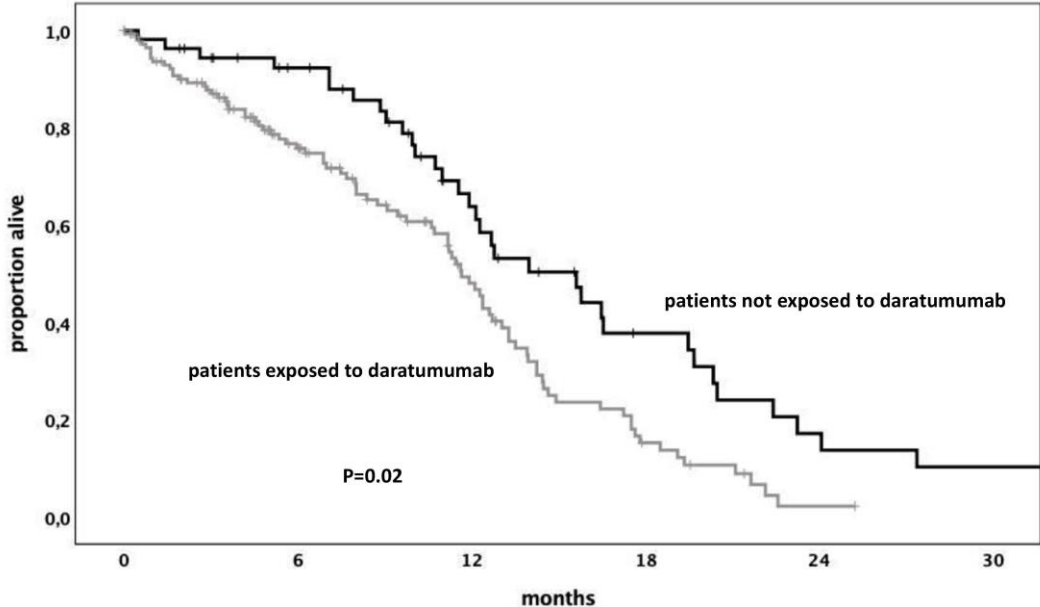

Supplementary Figure 2A

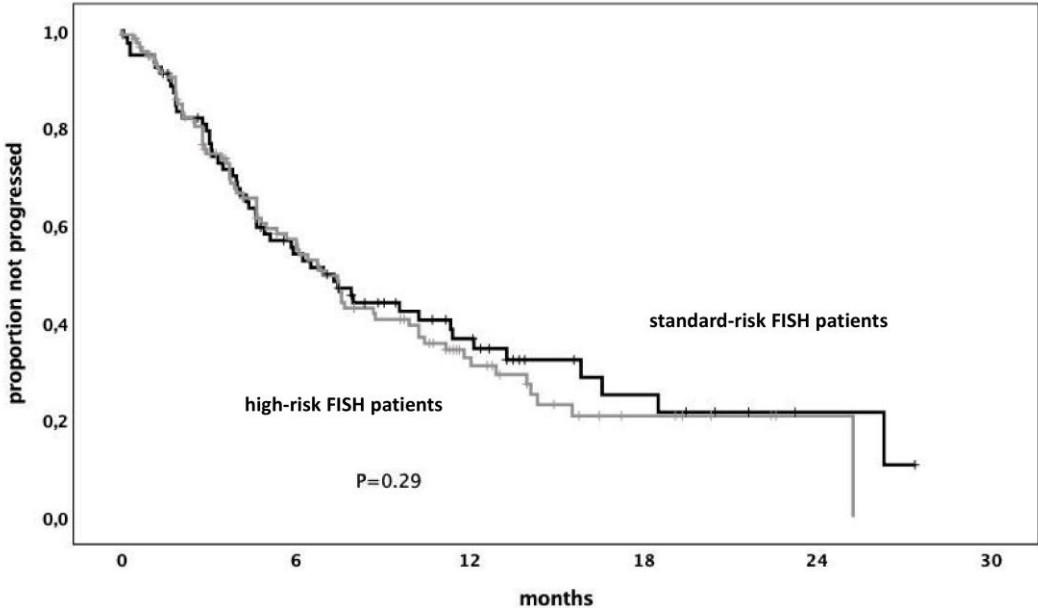

Supplementary Figure 2B

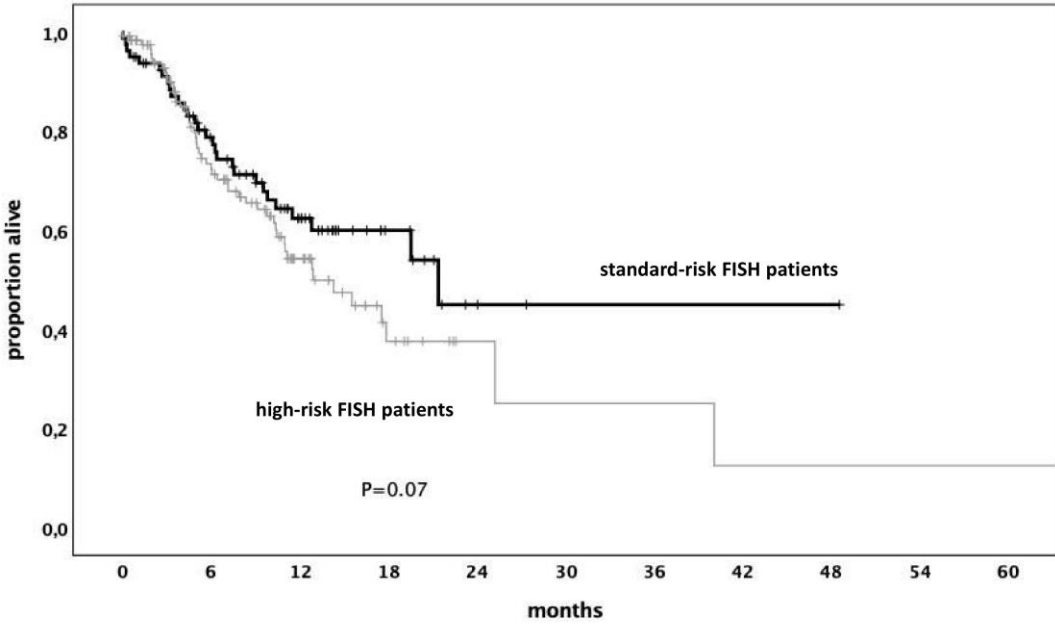

Supplement: 2023_283251_GENTILE_SUPPL.pdf [file 2023_283251_GENTILE_SUPPL.pdf]
